# Supplementary material for: Electrochemical protein recognition based on macromolecular self-assembly of molecularly imprinted polymer: a new strategy to mimic antibody for label-free biosensing
Source: Royal Society of Chemistry journal article supplement (doi:10.1039/c9tb00220k), 2019-01-01
Supplement: c9tb00220k1.pdf [file c9tb00220k1.pdf]

Electrochemical protein recognition based on macromolecular self-  
assembly of molecularly imprinted polymer: a new strategy to mimic  
antibody for label-free biosensing

**Author**

Wei Zhao <sup>a,b</sup>, Bing Li <sup>b</sup>, Sheng Xu <sup>a</sup>, Xuwen Huang <sup>a</sup>, Jing Luo <sup>b</sup>, Ye Zhu <sup>c\*</sup>, Xiaoya  
Liu <sup>a\*</sup>

**Unit**

<sup>a</sup> Key Laboratory of Synthetic and Biological Colloids, Ministry of Education, Jiangnan  
University, Wuxi 214122, Jiangsu Province, P. R. China

<sup>b</sup> School of Chemical and Material Engineering, Jiangnan University, Wuxi 214122,  
Jiangsu Province, P. R. China

<sup>c</sup> International Research Center for Photoresponsive Molecules and Materials, Jiangnan  
University, Wuxi 214122, Jiangsu Province, P. R. China

**The Corresponding Author and Contact Information**

\* Tel.: +86 510 85917763; fax: +86 510 85917763

E-mail addresses: lxy@jiangnan.edu.cn (X. Liu); zhuye@jiangnan.edu.cn (Y. Zhu)

## Characterization and Measurement

The chemical structure of PDHS and UPDHS polymer was characterized by a Bruker (400 MHz) instrument using deuterated chloroform ( $\text{CDCl}_3$ ) as solvent. Fourier-transform infrared spectroscopy (FT-IR) spectra was recorded on a Nicolet iS50 Fourier Infrared Spectrometer. The morphologies of BSA@UPDHS nanoparticles were observed using both a JEOL JEM-2100 transmission electron microscope (TEM) operating at 200 kV. Dynamic light scattering (DLS) experiment was conducted using an ALV-5000/E dynamic light scattering instrument at  $90^\circ$ , and all sample solutions were passed through 0.8 mm Millipore filters prior to load into the sample cell. Far UV circular dichroism (CD) was recorded on a MOS-450 spectropolarimeter (Biologic Co., Ltd., France). The irradiation light for photo-crosslinking was obtained from a UV-vis spot curing system (UV-100D, ANEST IWATA Co., Ltd., Japan) combined with a 365 nm filter, and was applied vertically above the electrode. The BSA@MIP coating morphologies on the electrode surface were observed using a Hitachi S-4800 field emission scanning electron microscope (FESEM).

Differential Pulse Stripping Voltammetry (DPSV), Cyclic Voltammetry (CV) and Electrochemical Impedance Spectroscopy (EIS) were performed in a three-electrode system with an electrochemical workstation (CHI660E, Shanghai, China). CV was carried out between -0.20 V and 0.60 V in a  $5 \text{ mmol L}^{-1} [\text{Fe}(\text{CN})_6]^{3-/4-}$  and  $0.2 \text{ mol L}^{-1}$  KCl solution at scan rate of  $100 \text{ mV s}^{-1}$ . EIS was also tested in a  $5 \text{ mmol L}^{-1} [\text{Fe}(\text{CN})_6]^{3-/4-}$  and  $0.2 \text{ mol L}^{-1}$  KCl solution. DPSV curves were obtained in a  $0.1 \text{ mol L}^{-1}$  PBS (pH=7.4) solution containing  $5 \text{ mmol L}^{-1} [\text{Fe}(\text{CN})_6]^{3-/4-}$  between -0.20 V and 0.40 V

after incubating in various concentrations of templates. The bare gold electrode (4 mm diameter; Aida, Tianjin, China), and the BSA@MIP sensor were used as working electrode (WE). A platinum electrode and a saturated calomel electrode (SCE, Aida) were used as counter and reference electrode, respectively. All potentials applied to WE were referred to SCE.

## Supplementary Results

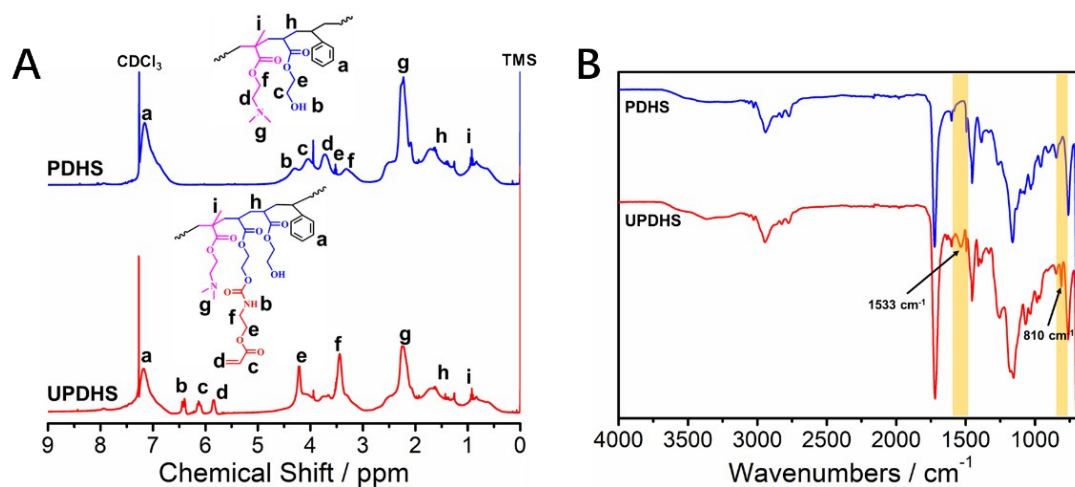

Fig.S1.  $^1\text{H}$  NMR spectra (A) and FT-IR (B) of amphiphatic copolymer PDHS and UV-crosslinkable macromonomer UPDHS.

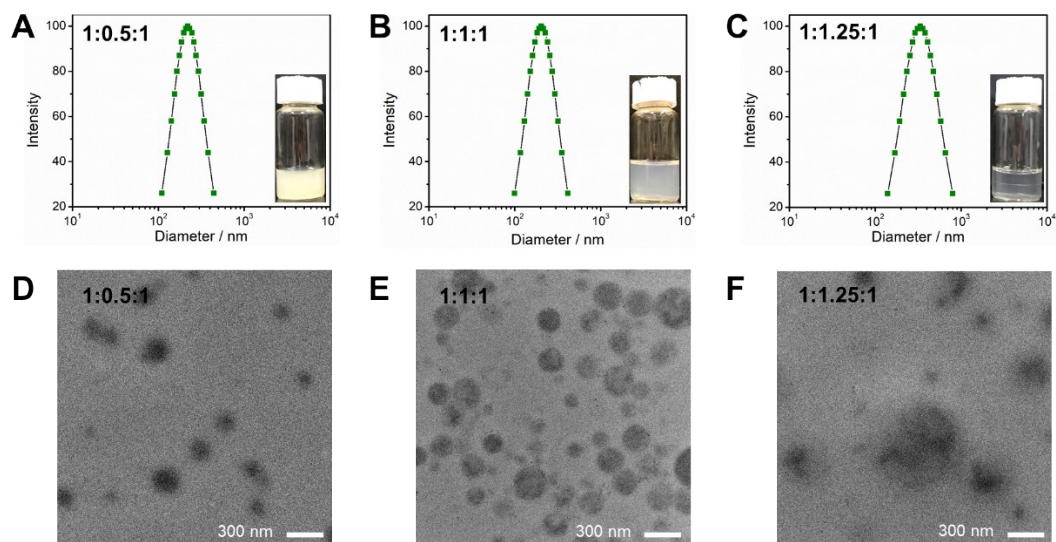

Fig.S2. The diameters and TEM images of different ratio of monomers (DMAEMA:HEA:St): (A) and (D) 1:0.5:1; (B) and (E) 1:1:1; (C) and (F) 1:1.25:1. We controlled the HEA content to obtain different UPDHS with different double bond content, because the amount of UV-crosslinkable acrylate side groups (ICEA) was determined by HEA (Scheme 2). Double bond content is the key to command the

formation of BSA@UPDHS NPs and performance of MIP sensor originated from UV-crosslinkable macromonomer. The diameters and TEM images of different BSA@UPDHS NPs were shown in Fig.S2. With the increase of HEA, double bond content increased and the average diameter of BSA@UPDHS NPs increased as well. In a general way, the degree of UV-crosslinking would increase with more double bond in UPDHS, resulting in more robust and stable MIP layer. However, the BSA@UPDHS NPs with excess double bond would be irregular and varisized as shown in Fig.S2 C and F. Therefore, the copolymer UPDHS with the molar ratio of 1:1:1 (DMEEMA:HEA:St) was chosen to investigate the performance of MIP sensor.

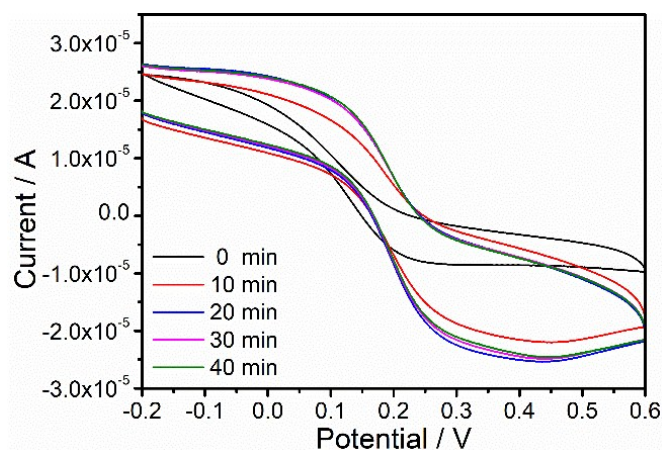

Fig.S3. CV voltammograms of BSA@MIP sensor after different extraction time.

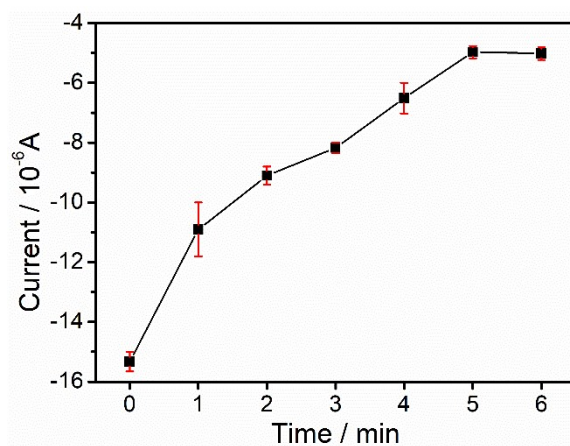

Fig.S4. DPSV peak currents of BSA@MIP sensor in PBS (pH 7.4) solution containing  $[\text{Fe}(\text{CN})_6]^{3-/4-}$  as probe after incubation in  $10^{-11}$  mg mL $^{-1}$  BSA aqueous solution for different time.

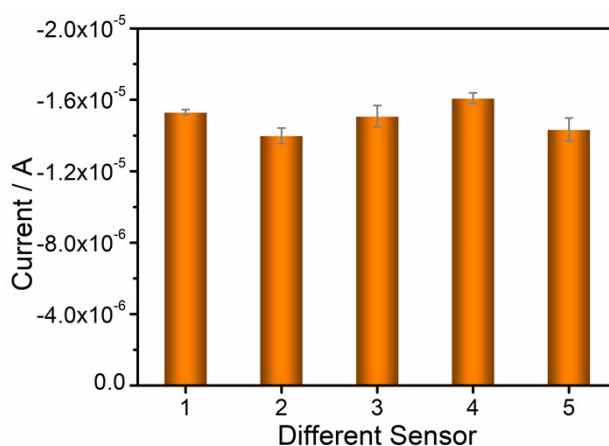

Fig.S5. DPSV response currents of different BSA@MIP sensors after protein extraction. The sensors were constructed using the same procedures.

Table S1. Comparison of sensing performance data of proposed method with other materials applied for BSA detection.

| Materials                           | Linear range (mg mL $^{-1}$ )             | References |
|-------------------------------------|-------------------------------------------|------------|
| BSA/WMMIP                           | $5 \times 10^{-10} \sim 5 \times 10^{-7}$ | 1          |
| Epitope-based MIP/HRP amplification | $10^{-6} \sim 1.5 \times 10^{-4}$         | 2          |

|                        |                                 |           |
|------------------------|---------------------------------|-----------|
| MIP Microspheres       | $10^{-5} \sim 5 \times 10^{-3}$ | 3         |
| MIP IL/CNTs            | $10^{-4} \sim 10^{-1}$          | 4         |
| Chitosan/CNTs          | $10^{-7} \sim 10^{-1}$          | 5         |
| Graphite-based ink/MIP | $10^{-3} \sim 10^2$             | 6         |
| TGA-CdTe/MIP           | $4.6 \sim 1.5 \times 10^2$      | 7         |
| BSA@UPDHS              | $10^{-14} \sim 10^{-9}$         | This work |

---

## References

- 1 D. G. Li, Q. H. He, Y. H. He, M. G. Xin, Y. L. Zhang and Z. Y. Shen, *Biosens. Bioelectron.*, 2017, 94, 328-334.
- 2 M. X. Li, X. H. Wang, L. M. Zhang and X. P. Wei, *Anal. Biochem.*, 2017, 530, 68-74.
- 3 J. H. Yu, F. W. Wan, C. C. Zhang, M. Yan, X. N. Zhang and S. W. Wang, *Biosens. Bioelectron.*, 2010, 26, 632-637.
- 4 Y. Y. Wang, M. Han, G. S. Liu, X. D. Hou, Y. N. Huang, K. B. Wu and C. Y. Li, *Biosens. Bioelectron.*, 2015, 74, 792-798.
- 5 H. J. Chen, Z. H. Zhang, L. J. Luo and S. Z. Yao, *Sensor. Actuat. B-Chem.*, 2012, 163, 76-83.
- 6 N. S. Ferreira, A. P. T. Moreira, M. H. M. de Sá and M. G. F. Sales, *Sensor. Actuat. B-Chem.*, 2017, 243, 1127-1136.
- 7 M. R. Chao, C. W. Hu and J. L. Chen, *Anal. Chim. Acta*, 2016, 925, 61-69.
